# Supplementary material for: Nd3+ sensitized core-shell-shell nanocomposites loaded with IR806 dye for photothermal therapy and up-conversion luminescence imaging by a single wavelength NIR light irradiation
Source: PubMed Central journal article supplement — Nanotheranostics. 2018 May 24;2(3):243–57. doi: 10.7150/ntno.25901 (PMC5984287; doi:10.7150/ntno.25901), 2018-05-24
Supplement: ntnov02p0243s1.pdf [file ntnov02p0243s1.pdf]

## Supplementary Material

# **Nd<sup>3+</sup> sensitized core-shell-shell nanocomposites loaded with IR806 dyes for photothermal therapy and up-conversion luminescence imaging by single wavelength NIR light irradiation**

Syue-Liang Lin<sup>1</sup>, Zi-Rong Chen<sup>1</sup>, C. Allen Chang<sup>1,2,3\*</sup>

1. Department of Biotechnology and Laboratory Science in Medicine, National Yang-Ming University, Taipei 112, Taiwan.
2. Department of Biomedical Imaging and Radiological Sciences, National Yang-Ming University, Taipei 112, Taiwan.
3. Molecular Imaging Research Center (MIRC), National Yang-Ming University, Taipei 112, Taiwan.

Corresponding authors: [cachang@ym.edu.tw](mailto:cachang@ym.edu.tw)

**Method S1.** Geometric TEM morphological and ICP data analysis of core, core-shell and core-shell-shell UCNPs.

From the TEM images we were able to estimate the volumes of the core and shells in the UCNPs according to a literature published method with some modifications.[66] Assuming the UCNPs are all cylindrical with the respective diameters and height,  $D_{\text{core}}=17.6$  nm,  $H_{\text{core}}=23.5$  nm ;  $D_{\text{core-shell1}}=20.6$  nm,  $H_{\text{core-shell1}}=32.3$  nm;  $D_{\text{core-shell1-shell2}}=25$  nm,  $H_{\text{core-shell1-shell2}}=41$  nm for the core, core-shell and core-shell-shell UCNPs, the volumes ( $V$ ) could be easily calculated using the equation,  $V=4/3 \pi (D/2)^2 H$  to be  $V_{\text{core}} = 4/3 \pi (D_{\text{core}}/2)^2 H_{\text{core}} = 5.71\text{E}+3 \text{ nm}^3$ ,  $V_{\text{core-shell}} = 4/3 \pi (D_{\text{core-shell}}/2)^2 H_{\text{core-shell}} = 10.76\text{E}+3 \text{ nm}^3$  and  $V_{\text{core-shell-shell}} = 4/3 \pi (D_{\text{core-shell-shell}}/2)^2 H_{\text{core-shell-shell}} = 20.12\text{E}+3 \text{ nm}^3$ . The volume ratio of  $V_{\text{core}} : V_{\text{core-shell}} : V_{\text{core-shell-shell}}$  is then normalized to be 1.00 : 1.88 : 3.52.

If  $V_{\text{shell1}}$  is defined as the volume of the inner shell, it can be calculated using the volume ratio data, i.e. by  $V_{\text{core-shell}} - V_{\text{core}} = 1.88 - 1.00 = 0.88 V_{\text{core}}$ , and similarly, the volume of the outer shell  $V_{\text{shell2}} = V_{\text{core-shell-shell}} - V_{\text{core-shell}} = 3.52 - 1.88 = 1.64 V_{\text{core}}$ . Thus, the normalized volume ratio of  $V_{\text{core}} : V_{\text{shell1}} : V_{\text{shell2}}$  is 1.00 : 0.88 : 1.64.

Additionally, assuming the volume ratio is similar to the mole ratio, and taking the core-shell UCNPs as an example, the apparent formula from TEM image analysis is actually  $[\text{NaYF}_4:\text{Yb}(20\%), \text{Er}(2\%)]_1 @ [\text{NaYF}_4:\text{Yb}(20\%)]_{0.88}$ . In 1 mmol core-shell UCNPs, the  $\text{Y}^{3+}$  content is 0.78 (in core) + 0.88\*0.8 (in shell) = 1.484 mmol, the  $\text{Yb}^{3+}$  content is 0.2 (in core) + 0.88\*0.2 (in shell) = 0.376 mol, and the  $\text{Er}^{3+}$  content is 0.15 (in core) + 0.00 (in shell) mol. The respective mole% of  $\text{Y}^{3+}$  is therefore

$1.484 / (1.484 + 0.376 + 0.15) = 78.9\%$ , and similarly,  $\text{Yb}^{3+}$  mole% = 32.5%,  $\text{Er}^{3+}$  mole% = 1.7%. On the other hand, the mass of  $\text{Lu}^{3+}$  is  $88.91 \text{ mg/mol} * 1.484 = 131.94 \text{ mg}$ . Similarly, the respective masses for the  $\text{Yb}^{3+}$  and  $\text{Er}^{3+}$  are 65.07 mg and 3.35 mg. The  $\text{Y}^{3+}$  wt% is therefore  $131.94 / (131.94 + 65.07 + 3.35) = 65.9\%$ , and similarly,  $\text{Yb}^{3+}$  wt% = 32.5 %,  $\text{Er}^{3+}$  wt% = 1.7 %.

For the ICP data, taking the core-shell-shell UCNPs as an example, the  $\text{Y}^{3+}$ ,  $\text{Yb}^{3+}$ ,  $\text{Er}^{3+}$  and  $\text{Nd}^{3+}$  contents are 8.48, 4.87, 0.13 and 1.17 ppm, respectively. The wt% for  $\text{Lu}^{3+}$  is therefore  $8.48 / (8.48 + 4.87 + 0.13 + 1.17) = 57.9\%$ ; similarly, the wt% for  $\text{Yb}^{3+}$ ,  $\text{Er}^{3+}$  and  $\text{Nd}^{3+}$  are 33.2%, 0.9% and 8.0%, respectively. The mole% for  $\text{Y}^{3+}$  is  $(8.48 / 88.91) / [(8.48 / 88.91) + (4.87 / 173.05) + (0.13 / 167.26) + (1.17 / 144.24)] = 72.0\%$ ; similarly, the mole% for  $\text{Yb}^{3+}$ ,  $\text{Er}^{3+}$  and  $\text{Nd}^{3+}$  are 21.3%, 0.6% and 6.1%, respectively.

**Method S2.** Calculation of the photothermal conversion efficiency ( $\eta$ ) for UCNC-FAs.

The photothermal conversion efficiency was calculated using eq. S1, where  $h$  is the heat transfer coefficient,  $S$  is the surface area of the container, the maximum steady temperature ( $T_{\text{max}}$ ) of the solution of the FA-UCNCs was  $45.4 \text{ }^\circ\text{C}$ , the environmental temperature ( $T_{\text{surr}}$ ) was  $29.3 \text{ }^\circ\text{C}$ ,  $Q_{\text{dis}}$  was the heat dissipated from the light absorbed by the solvent and quartz cuvette (i.e. 51.3 mW),  $I$  was the power of the 793 nm laser (i.e.  $2 \text{ W/cm}^2$ ), and  $A_{793}$  was the absorbance of the UCNC-FAs at 793 nm (i.e. 0.650). The  $hS$  value could be obtained to be  $45 \text{ mW/}^\circ\text{C}$  from eq. S2, where  $\tau_s$  was the time constant and was determined to be 280.0 s, and  $m_D$  is 3 g and  $C_d$  is  $4.2 \text{ J/g}\cdot^\circ\text{C}$ . Thus, substituting the values of these parameters into Eq. S1, the photothermal conversion efficiency ( $\eta$ ) of the UCNC-FAs could be calculated to be 46%.

$$\eta = \frac{hS(T_{\text{max}} - T_{\text{surr}}) - Q_{\text{dis}}}{I(1 - 10^{-A_{793}})} \quad (\text{Eq. S1})$$

$$hS = \frac{m_D C_d}{\tau_s} \quad (\text{Eq. S2})$$

Figures.

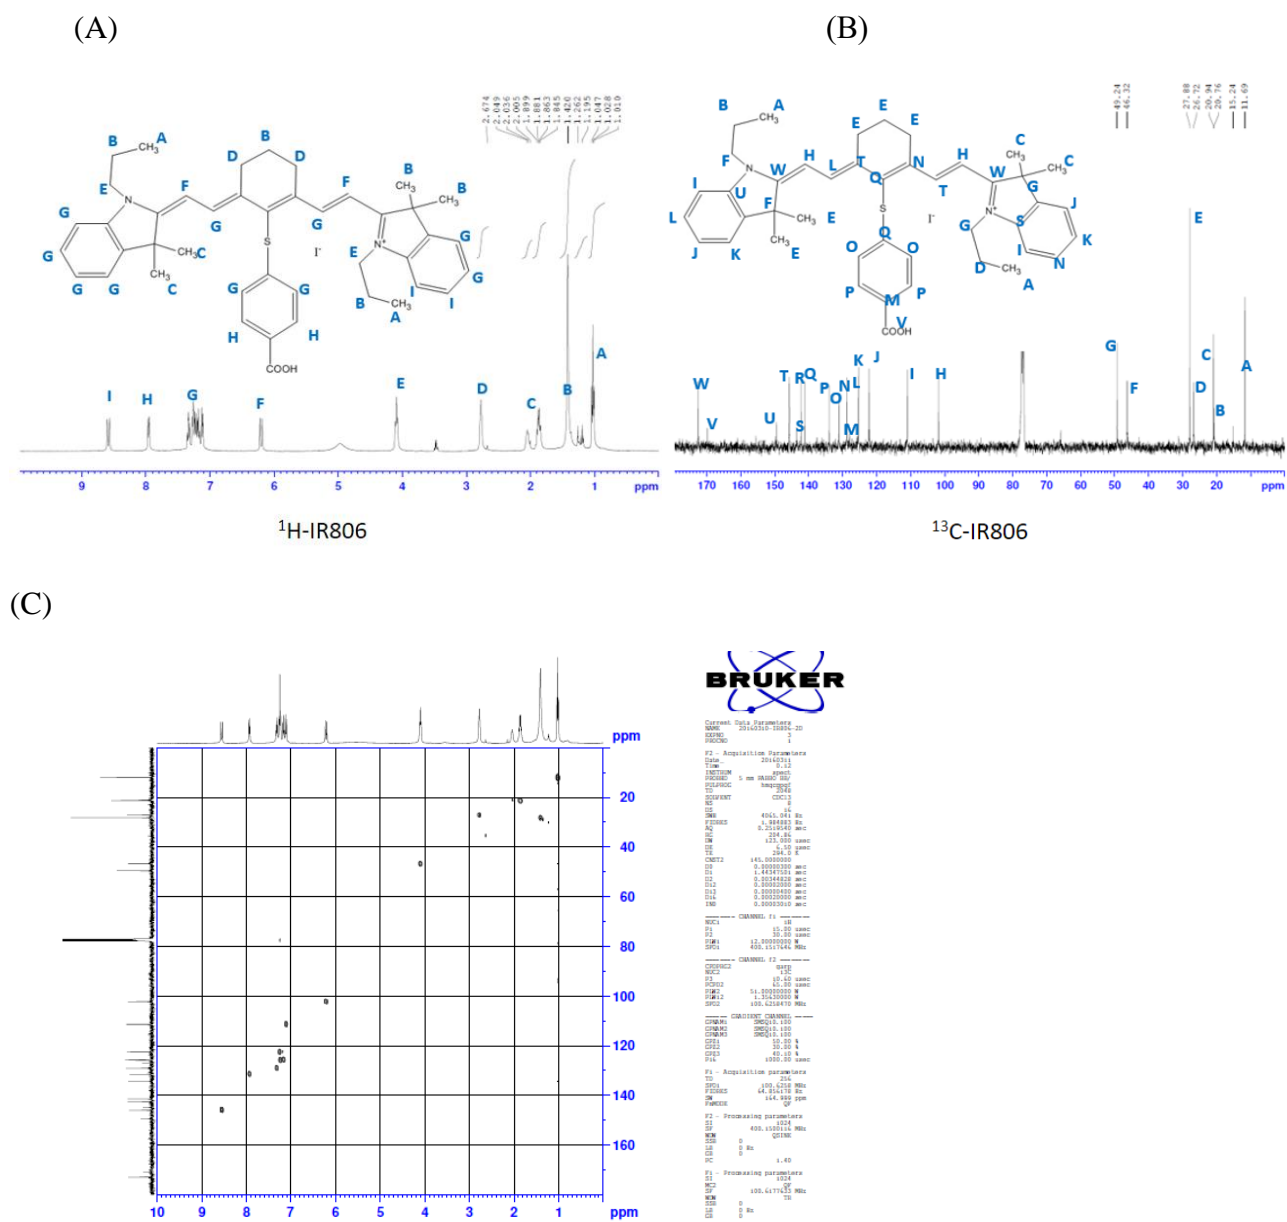

Figure S1. (A)  ${}^1\text{H}$  NMR (400MHz,  $\text{D}_2\text{O}$ ) spectrum of IR806, (B)  ${}^{13}\text{C}$  NMR (400MHz,  $\text{D}_2\text{O}$ ) spectrum of IR806 and (C) 2D-NMR (x:  ${}^1\text{H}$  ; y:  ${}^{13}\text{C}$ ) of IR806.

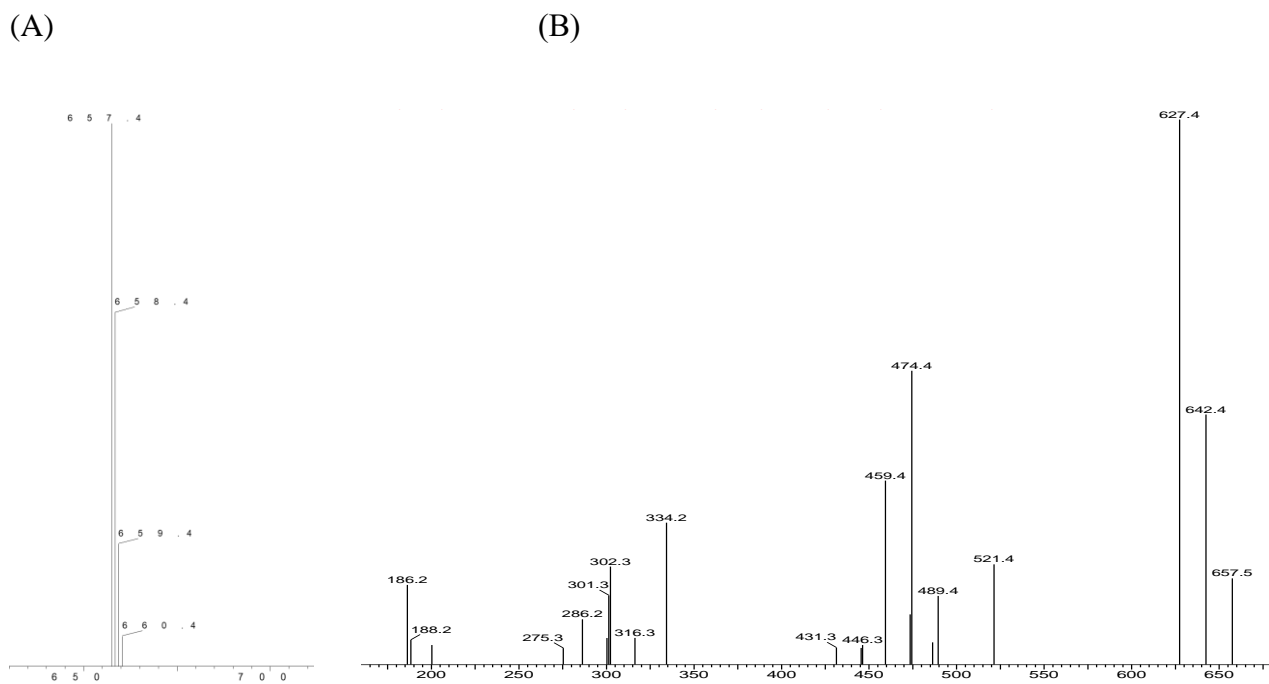

**Figure S2.** (A) The ESI+ mass spectrum of IR806.  $[M]^+$  calc. for  $C_{43}H_{49}N_2O_2S^+$ , 657.35(100.0%), 658.35(48.0%), 659.36(11.3%), found 657.4, 658.4, and 659.4. (B) MS-MS spectra of IR806.

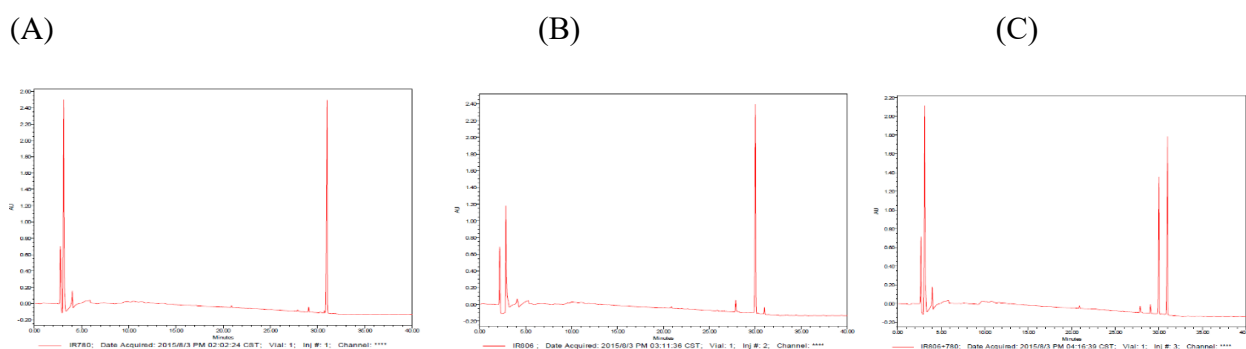

**Figure S3.** HPLC chromatograms of : (A) IR780, retention time = 31.0 min. (B) IR806, retention time = 30.0 min. and (C) mixture of IR806 and IR780. HPLC equipment: Waters 1525 pump with Waters 2489 UV/visible detector (220 nm); analytical column (C18 inertsil ODS-3, 5 $\mu$ m 4.6 $\times$ 250mm). Condition: mobile phase (solvent A, 0.1% TFA in water; solvent B, acetonitrile); gradient (5~30 min 95%~40% solvent A); flow rate: 1 mL/min.

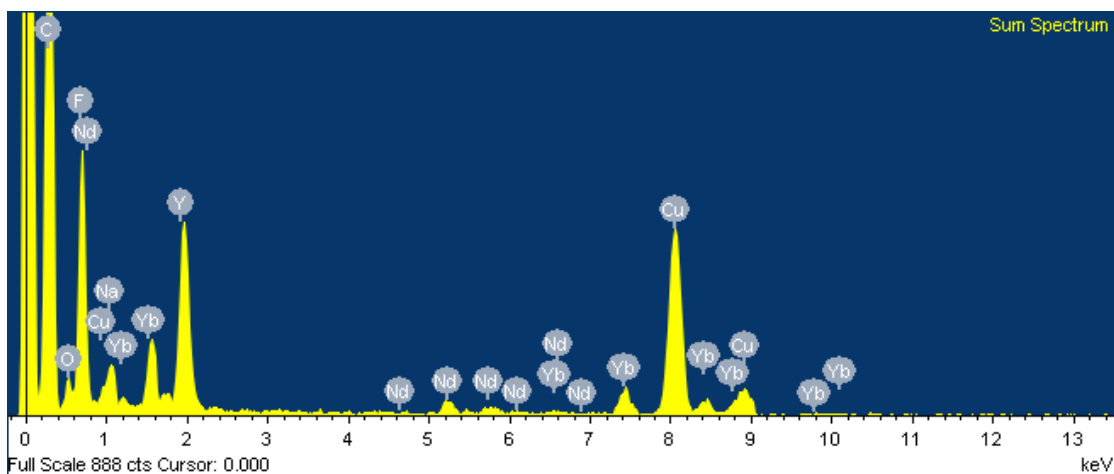

**Figure S4.** The EDS data of the core-shell-shell UCNPs. The  $\text{Er}^{3+}$  ions were confined in the inner region, thus could not be detected at outer region.

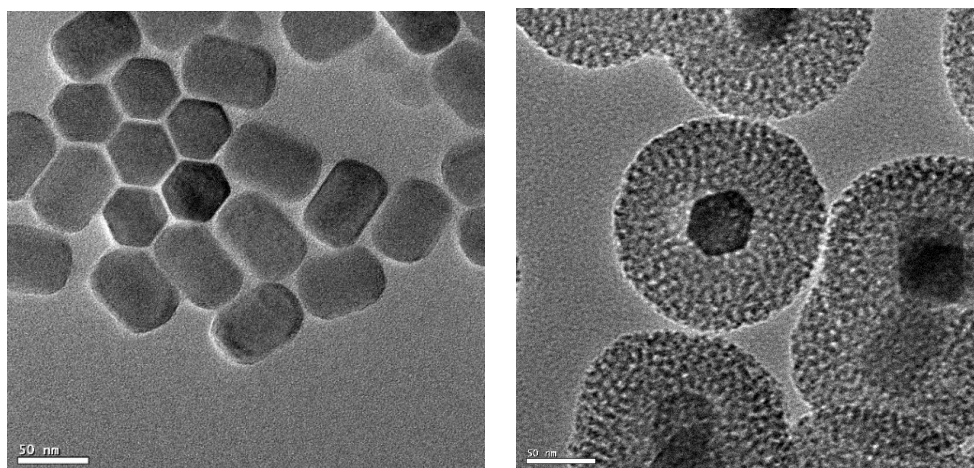

**Figure S5.** The high-resolution transmission electron microscopy (HR-TEM) images of the core-shell-shell UCNPs (left) and UCNP@mSiO<sub>2</sub> (right).

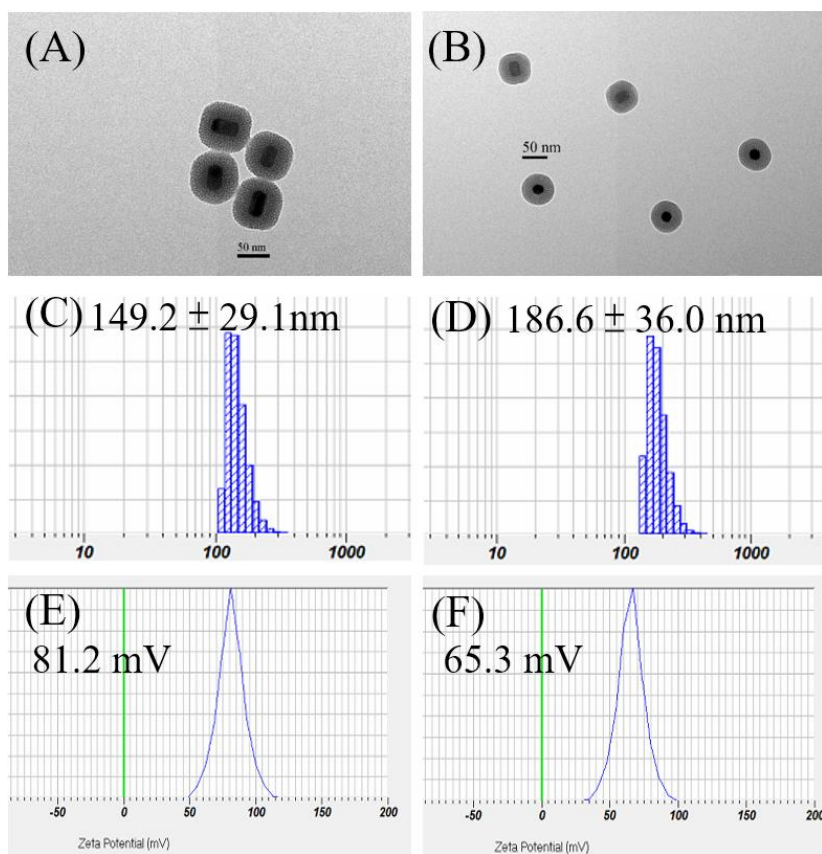

**Figure S6.** TEM images (A, B), DLS measurements (C, D) and Zeta Potential measurements (E, F). (A)(C)(E): UCNPs@mSiO<sub>2</sub>/IR806@PAH; (B)(D)(F): and UCNPs@mSiO<sub>2</sub>/IR806@PAH/PEG-FA.

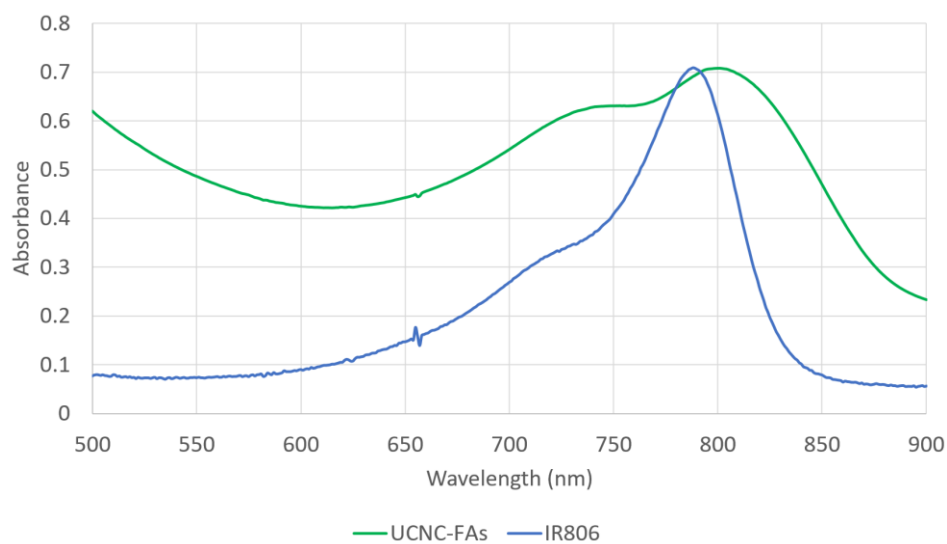

**Figure S7.** Absorption spectra of free type IR806 (green) and IR806 in UCNC-FAs (blue). [IR806] = 4.7 μM.
